# Supplementary material for: Visualization of trap distribution in SrAl2O4:Eu2+,Dy3+ revealed by simulations of luminescence changes in charging and emission of persistent luminescence and thermoluminescence based on a random walk model
Source: Royal Society of Chemistry journal article supplement (doi:10.1039/d5cp01232e), 2025-01-01
Supplement: d5cp01232e1.pdf [file d5cp01232e1.pdf]

## Supplementary information

# Visualization of trap distribution in $\text{SrAl}_2\text{O}_4:\text{Eu}^{2+},\text{Dy}^{3+}$ revealed by simulations of luminescence change in charging and emission of persistent luminescence and thermoluminescence based on a random walk model

**Ryusuke Koizumi, Ryoya Takahashi, Shigeki Yamada, Shingo Hattori, Kazuteru Shinozaki\***

|     |                                                                                                                                                 |    |
|-----|-------------------------------------------------------------------------------------------------------------------------------------------------|----|
| S-1 | Experimental<br>Preparation of $\text{SAOED}_x$ ( $x = 2, 4, 5, 6, 8, 10$ )<br>Measurement                                                      | p2 |
| S-2 | PL emission and excitation spectra of $\text{SAOED}_x$ ( $x = 2, 4, 5, 6, 8, 10$ )                                                              | p3 |
| S-3 | PXRD of $\text{SAOED}_x$ ( $x = 2, 4, 5, 6, 8, 10$ )                                                                                            | p4 |
| S-4 | Lattice constants ( $a, b, c, \beta$ ) for $\text{SAOED}_x$ ( $x = 2, 4, 5, 6, 8, 10$ ) crystals                                                | p5 |
| S-5 | Electron populations in reservoirs $N_m$ ( $m = 0-6$ ) for $\text{SAOED}_x$ ( $x = 2, 4, 5, 6, 8, 10$ )                                         | p6 |
| S-6 | Luminescence changes in charging and PersL processes for $\text{SAOED}_x$ ( $x = 2, 4, 5, 6, 8, 10$ )                                           | p7 |
| S-7 | Parameters determined through the simulation of the luminescence changes in charging and PersL for $\text{SAOED}_x$ ( $x = 2, 4, 5, 6, 8, 10$ ) | p8 |

## S-1. Experimental

### Preparation of PersL SAOED<sub>x</sub> ( $x = 2, 4, 5, 6, 8, 10$ )

Sr<sub>0.9</sub>Al<sub>2</sub>O<sub>4</sub>:Eu<sup>2+</sup><sub>0.01x</sub>Dy<sup>3+</sup><sub>(0.1-0.01x)</sub> ( $x = 2, 4, 5, 6, 8, 10$ ), SAOED<sub>x</sub>, were synthesized according to the procedure described in the literature.<sup>s1</sup> To a mixture of SrCO<sub>3</sub> and Al<sub>2</sub>O<sub>3</sub> powders in the molar ratio 0.9 : 1.0, Eu<sub>2</sub>O<sub>3</sub> and Dy<sub>2</sub>O<sub>3</sub> powders were added so as to be the molar ratios of 0.02 : 0.08, 0.04 : 0.06, 0.05 : 0.05, 0.06 : 0.04, 0.08 : 0.02, or 0.10 : 0.00. After grinding for 1 h with a mortar and a pestle, the resulting powders were pressed under 2 t for 15 min to become pellet-like solid. The pellets of SAOED<sub>x</sub> were placed in a SILICONIT electric furnace TEXSH-530 under argon atmosphere containing 1% hydrogen gas and heated up from room temperature to 1500 °C for over 5 h. The temperature of the electric furnace was maintained at 1500 °C for 2 h and then decreased to room temperature over one night.

### Reference

s1. R. M. Calderón-Olvera, E. A. Albanés-Ojeda, M. García-Hipólito, J. M. Hernández-Alcántara, M. A. Álvarez-Perez, C. Falcony, O. Álvarez-Fregoso, *Ceram. Int.*, 2018, **44**, 7917.

### Measurement

PL and PeasL of SAOED<sub>x</sub> ( $x = 2, 4, 5, 6, 8, 10$ ) were recorded on a JASCO spectrofluorometer FP-6500. PXRD measurements were performed using a Bruker AXS NEW D8 ADVANCE with the Cu K $\alpha$  radiation (1.5406 Å) at 40 kV and 40 mA for SAOED<sub>x</sub> powders obtained by grinding with mortar and pestle. We employed an Oxford microstat N equipped with a thermo-controller Oxford ITC502 for the temperature control for TL spectra. The temperature of SAOED<sub>x</sub> powders increased at a rate of ca. 1 K/s from 200 K to 500 K. TL spectra were depicted against temperature corresponding to time from the beginning of the observation. For the TL measurement, after the samples were heated at 500 K for de-trapping under the dark and cooled to 200 K by liquid nitrogen, they were excited with 370 nm (10 W) LED light for 10 min and left to stand in the dark.

**S-2. PL emission and excitation spectra of SAOED<sub>x</sub> ( $x = 2, 4, 5, 6, 8, 10$ )**

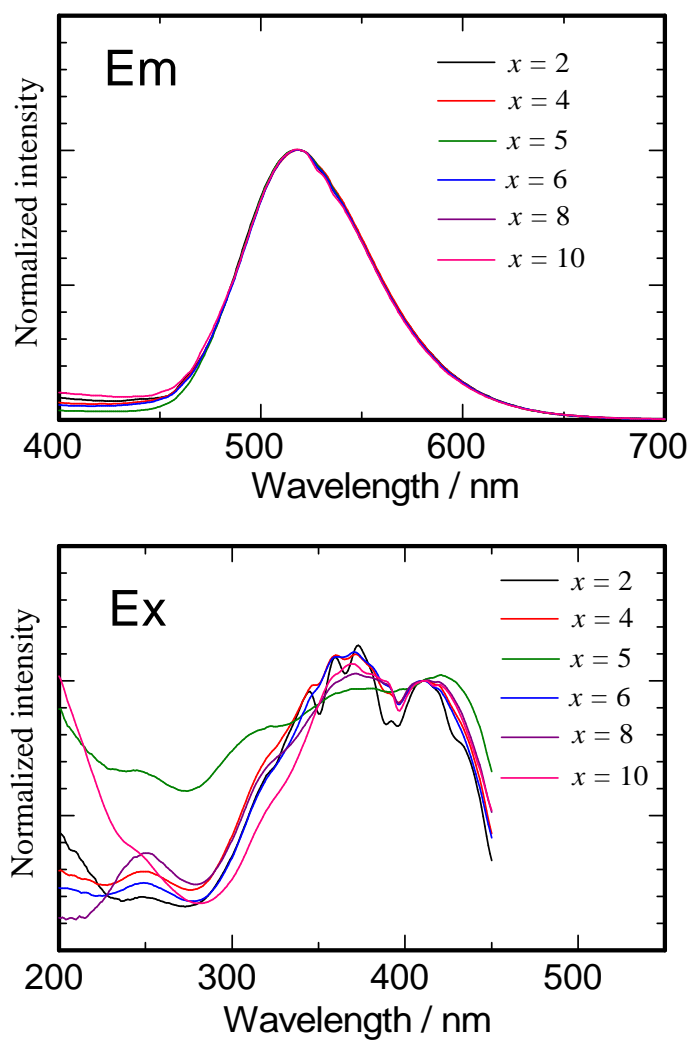

**Figure S1.** PL emission spectra (top) and excitation spectra (bottom) of SAOED<sub>x</sub> ( $x = 2$  (red), 4 (orange), 5 (green), 6 (dark green), 8 (cyan), 10 (blue)).

**S-3. PXRD of SAOED<sub>x</sub> ( $x = 2, 4, 5, 6, 8, 10$ )**

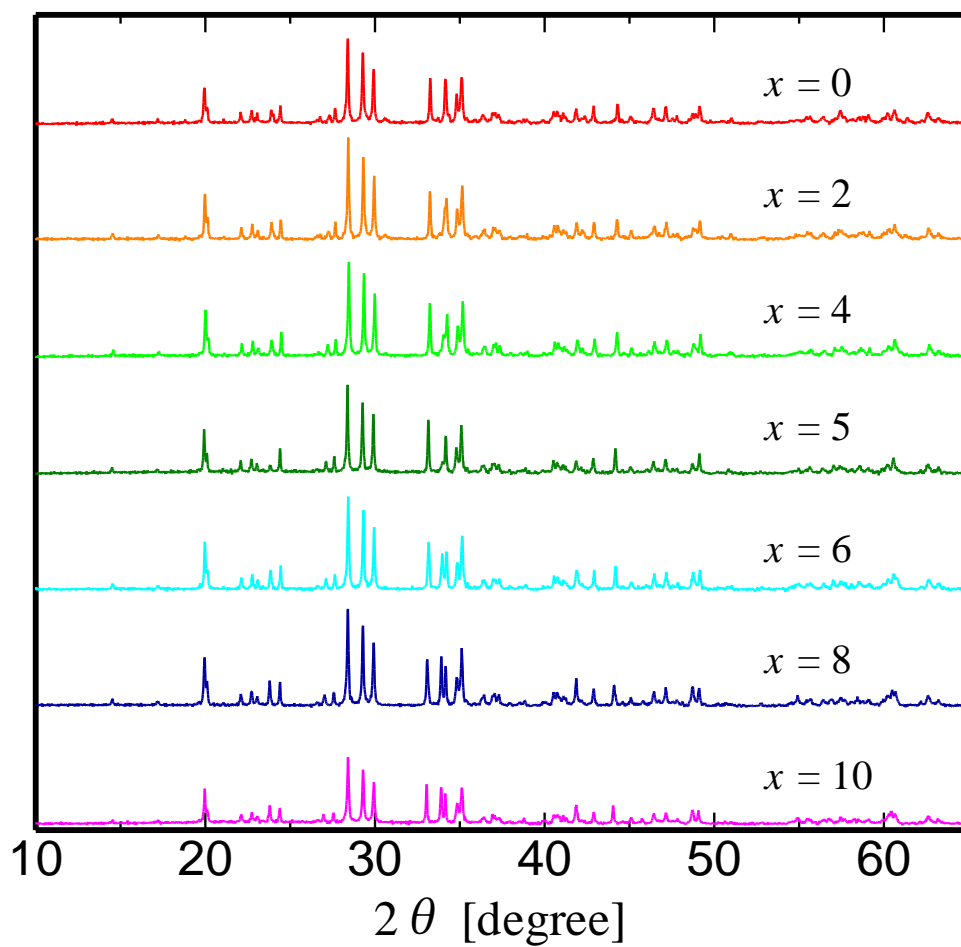

**Figure S2.** PXRD patterns of SAOED<sub>x</sub>, where  $x = 0$  (red), 2 (orange), 4 (green), 5 (dark green), 6 (cyan), 8 (blue), 10 (purple).

**S-4. Lattice constants ( $a$ ,  $b$ ,  $c$ ,  $\beta$ ) for SAOED <sub>$x$</sub>  ( $x = 2, 4, 5, 6, 8, 10$ ) crystals**

**Table S1.** Lattice constants ( $a$ ,  $b$ ,  $c$ ,  $\beta$ ) for SAOED <sub>$x$</sub>  in the monoclinic crystal system evaluated from the PXRD patterns using the Bragg's equation.

| $x$ | $a / \text{\AA}$ | $b / \text{\AA}$ | $c / \text{\AA}$ | $\beta / ^\circ$ |
|-----|------------------|------------------|------------------|------------------|
| 0   | 8.384            | 8.887            | 5.198            | 93.403           |
| 2   | 8.381            | 8.879            | 5.193            | 93.400           |
| 4   | 8.367            | 8.870            | 5.188            | 93.396           |
| 5   | 8.380            | 8.904            | 5.208            | 93.406           |
| 6   | 8.374            | 8.887            | 5.198            | 93.401           |
| 8   | 8.382            | 8.887            | 5.191            | 93.257           |
| 10  | 8.383            | 8.887            | 5.186            | 93.298           |

**S-5. Electron populations in reservoirs  $N_m$  ( $m = 0-6$ ) for SAOED $_x$  ( $x = 2, 4, 5, 6, 8, 10$ )**

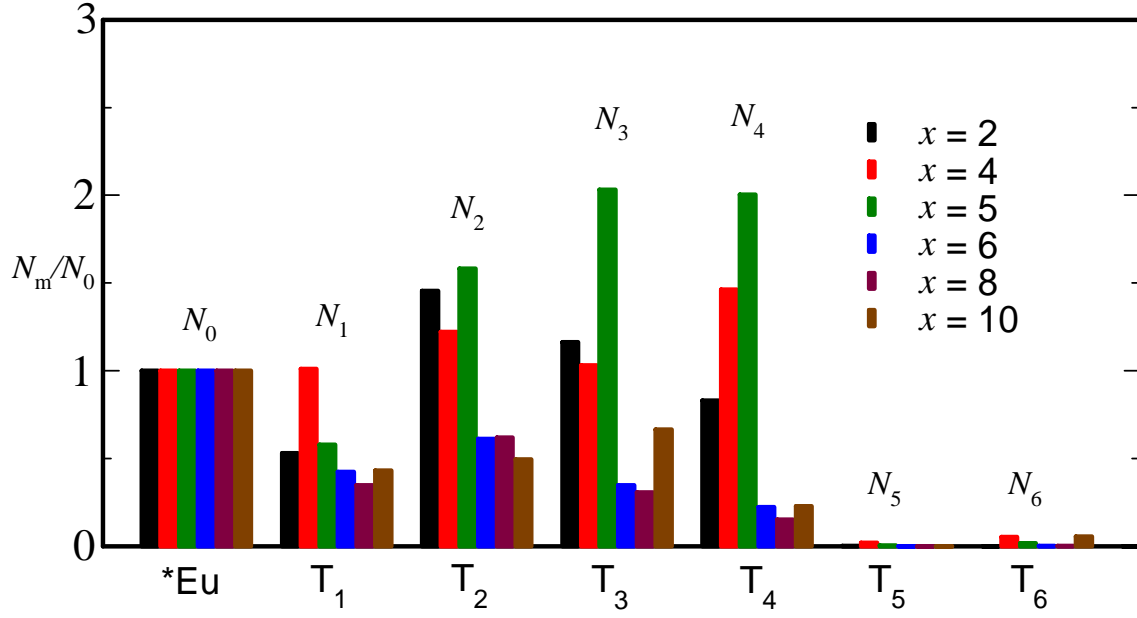

**Figure S3.** Electron populations in reservoirs  $N_m$  ( $m = 0-6$ ) for SAOED $_x$  ( $x = 2, 4, 5, 6, 8, 10$ ) predicted by the simulation of charging and PersL processes based on RWM.

**S-6. Luminescence changes in charging and PersL processes for SAOED<sub>x</sub> ( $x = 2, 4, 5, 6, 8, 10$ )**

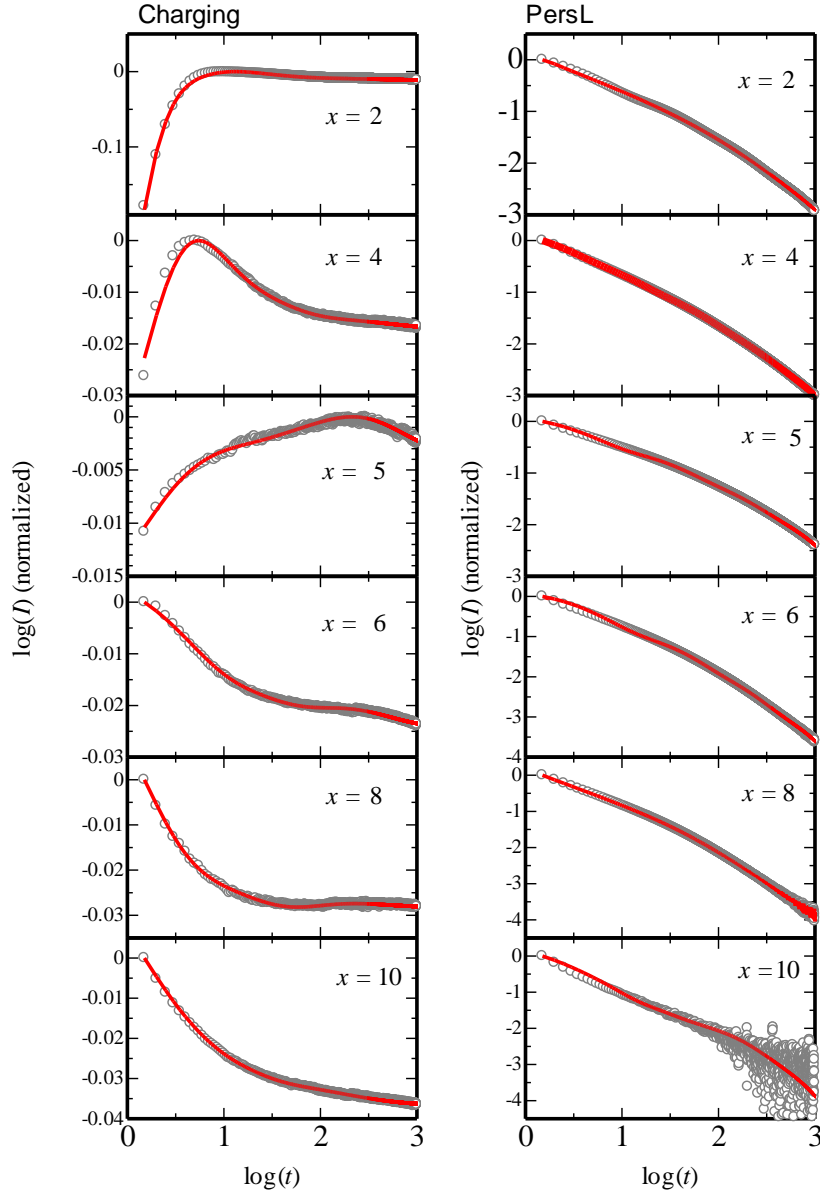

**Figure S4.** Luminescence changes in charging and PersL processes for SAOED<sub>x</sub> ( $x = 2, 4, 5, 6, 8, 10$ ). The red lines are the best fits for the curve fitting using equations  $I_c = I_{c1}\exp(-t/\tau_{c1}) + I_{c2}\exp(-t/\tau_{c2}) - I_{c3}\exp(-t/\tau_{c3}) + I_{c0}$  for the charging (left) and  $I_p = I_{p1}\exp(-t/\tau_{p1}) + I_{p2}\exp(-t/\tau_{p2}) + I_{p3}\exp(-t/\tau_{p3})$  for PersL (right).

**S-7. Parameters determined through the simulation of the luminescence changes in charging and PersL for SAOED<sub>x</sub> ( $x = 2, 4, 5, 6, 8, 10$ )**

**Table S2.** Parameters determined through the simulation of the luminescence changes in charging and PersL for SAOED<sub>x</sub> ( $x = 2, 4, 5, 6, 8, 10$ ) using equations  $I_c = I_{c1}\exp(-t/\tau_{c1}) + I_{c2}\exp(-t/\tau_{c2}) + I_{c3}\exp(-t/\tau_{c3}) + I_{c0}$  for the charging and  $I_p = I_{p1}\exp(-t/\tau_{p1}) + I_{p2}\exp(-t/\tau_{p2}) + I_{p3}\exp(-t/\tau_{p3})$ .

| $x$ | Charging                                                                                 |                                                                      | PersL                                                |                                                                  |
|-----|------------------------------------------------------------------------------------------|----------------------------------------------------------------------|------------------------------------------------------|------------------------------------------------------------------|
| 2   | $I_{c1} = 0.025$<br>$I_{c2} = 0.26$<br>$I_{c3} = -1.1$<br>$I_{c0} = 0.72$                | $\tau_{c1} = 44$ s<br>$\tau_{c2} = 51000$ s<br>$\tau_{c3} = 1.3$ s   | $I_{p1} = 89\%$<br>$I_{p2} = 10\%$<br>$I_{p3} = 1\%$ | $\tau_{p1} = 5.0$ s<br>$\tau_{p2} = 65$ s<br>$\tau_{p3} = 430$ s |
| 4   | $I_{c1} = 0.040$<br>$I_{c2} = 0.26$<br>$I_{c3} = -0.46$<br>$I_{c0} = 0.70$               | $\tau_{c1} = 23$ s<br>$\tau_{c2} = 61000$ s<br>$\tau_{c3} = 0.74$ s  | $I_{p1} = 89\%$<br>$I_{p2} = 9\%$<br>$I_{p3} = 1\%$  | $\tau_{p1} = 7.3$ s<br>$\tau_{p2} = 71$ s<br>$\tau_{p3} = 450$ s |
| 5   | $I_{c1} = 0.019$<br>$I_{c2} = -0.025$<br>$I_{c3} = -0.0083$<br>$I_{c0} = 0.98$           | $\tau_{c1} = 2600$ s<br>$\tau_{c2} = 3.0$ s<br>$\tau_{c3} = 70$ s    | $I_{p1} = 92\%$<br>$I_{p2} = 7\%$<br>$I_{p3} = 1\%$  | $\tau_{p1} = 3.7$ s<br>$\tau_{p2} = 49$ s<br>$\tau_{p3} = 450$ s |
| 6   | $I_{c1} = 490$<br>$I_{c2} = 0.017$<br>$I_{c3} = 6.3 \times 10^{-6}$<br>$I_{c0} = 0.94$   | $\tau_{c1} = 8.0$ s<br>$\tau_{c2} = 1400$ s<br>$\tau_{c3} = 10000$ s | $I_{p1} = 90\%$<br>$I_{p2} = 9\%$<br>$I_{p3} = 1\%$  | $\tau_{p1} = 2.6$ s<br>$\tau_{p2} = 27$ s<br>$\tau_{p3} = 170$ s |
| 8   | $I_{c1} = 0.098$<br>$I_{c2} = 0.029$<br>$I_{c3} = 1.9 \times 10^{-5}$<br>$I_{c0} = 0.94$ | $\tau_{c1} = 1.5$ s<br>$\tau_{c2} = 8.5$ s<br>$\tau_{c3} = 590$ s    | $I_{p1} = 91\%$<br>$I_{p2} = 8\%$<br>$I_{p3} = 1\%$  | $\tau_{p1} = 4.9$ s<br>$\tau_{p2} = 57$ s<br>$\tau_{p3} = 380$ s |
| 10  | $I_{c1} = 0.079$<br>$I_{c2} = 0.035$<br>$I_{c3} = 0.013$<br>$I_{c0} = 0.92$              | $\tau_{c1} = 1.9$ s<br>$\tau_{c2} = 11$ s<br>$\tau_{c3} = 190$ s     | $I_{p1} = 93\%$<br>$I_{p2} = 6\%$<br>$I_{p3} = 1\%$  | $\tau_{p1} = 3.2$ s<br>$\tau_{p2} = 49$ s<br>$\tau_{p3} = 270$ s |
